# Supplementary material for: Inhibition of Human Respiratory Influenza A Virus and Human Betacoronavirus-1 by the Blend of Double-Standardized Extracts of Aronia melanocarpa (Michx.) Elliot and Sambucus nigra L.
Source: MDPI journal article supplement (doi:10.3390/ph15050619), 2022-05-17

**==== Shimadzu LabSolutions Multi-Chromatogram ====**

mAU

The chromatogram of EAM

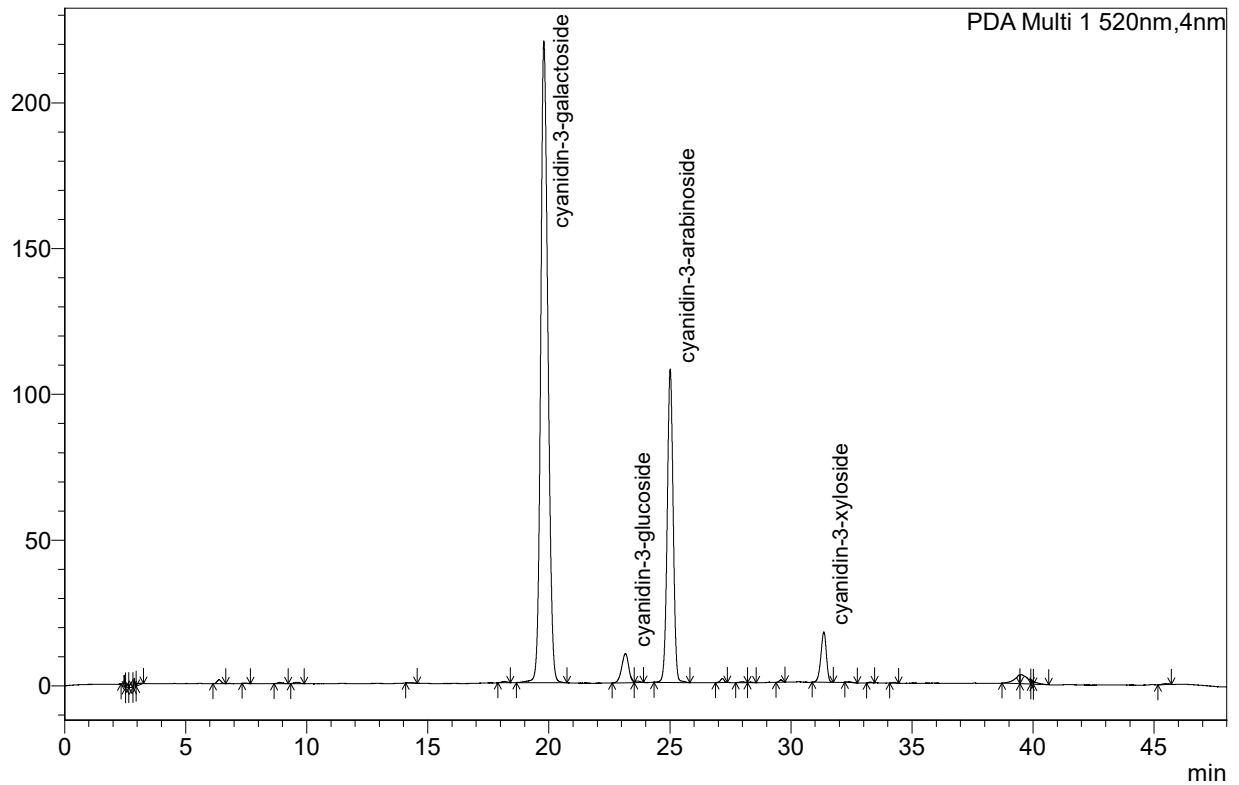

## ==== Shimadzu LabSolutions Multi-Chromatogram ====

mAU

The chromatogram of ESN

PDA Multi 1 520nm,4nm

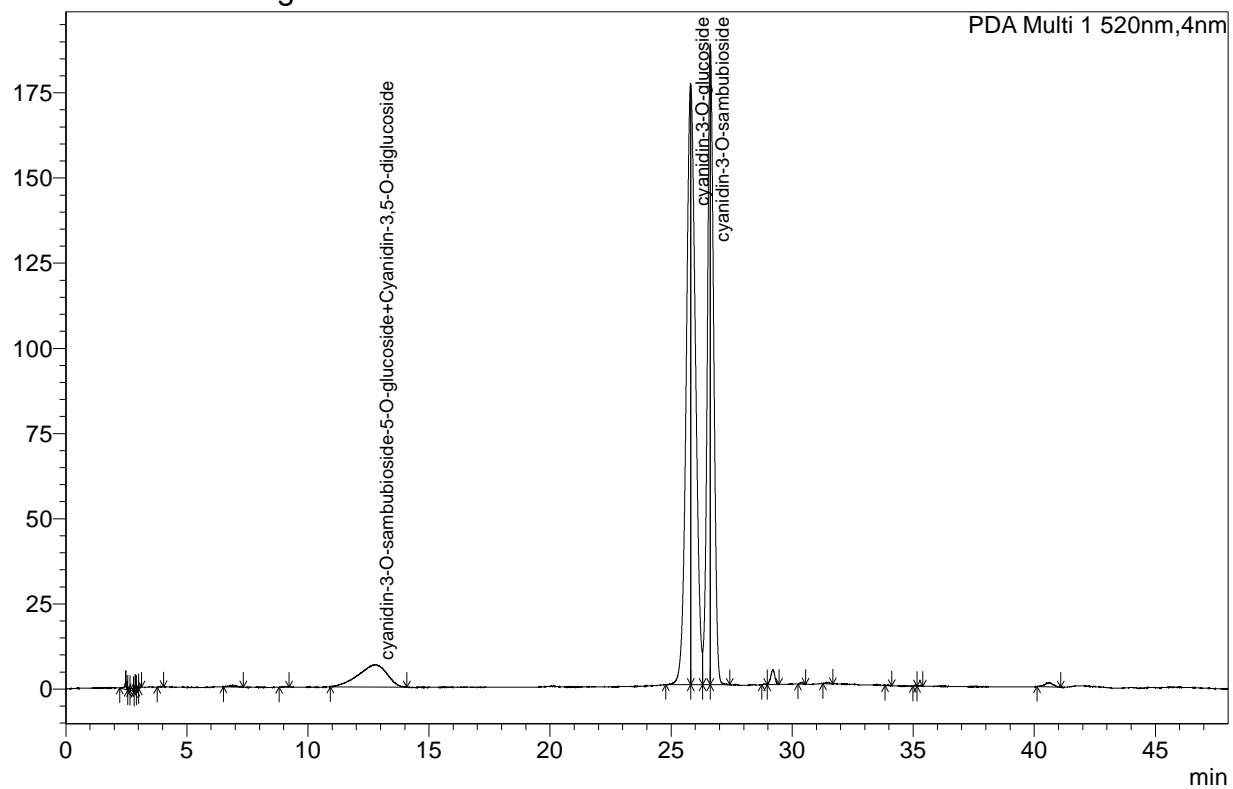

## ==== Shimadzu LabSolutions Multi-Chromatogram ====

mAU

The chromatogram of EAM-ESN blend

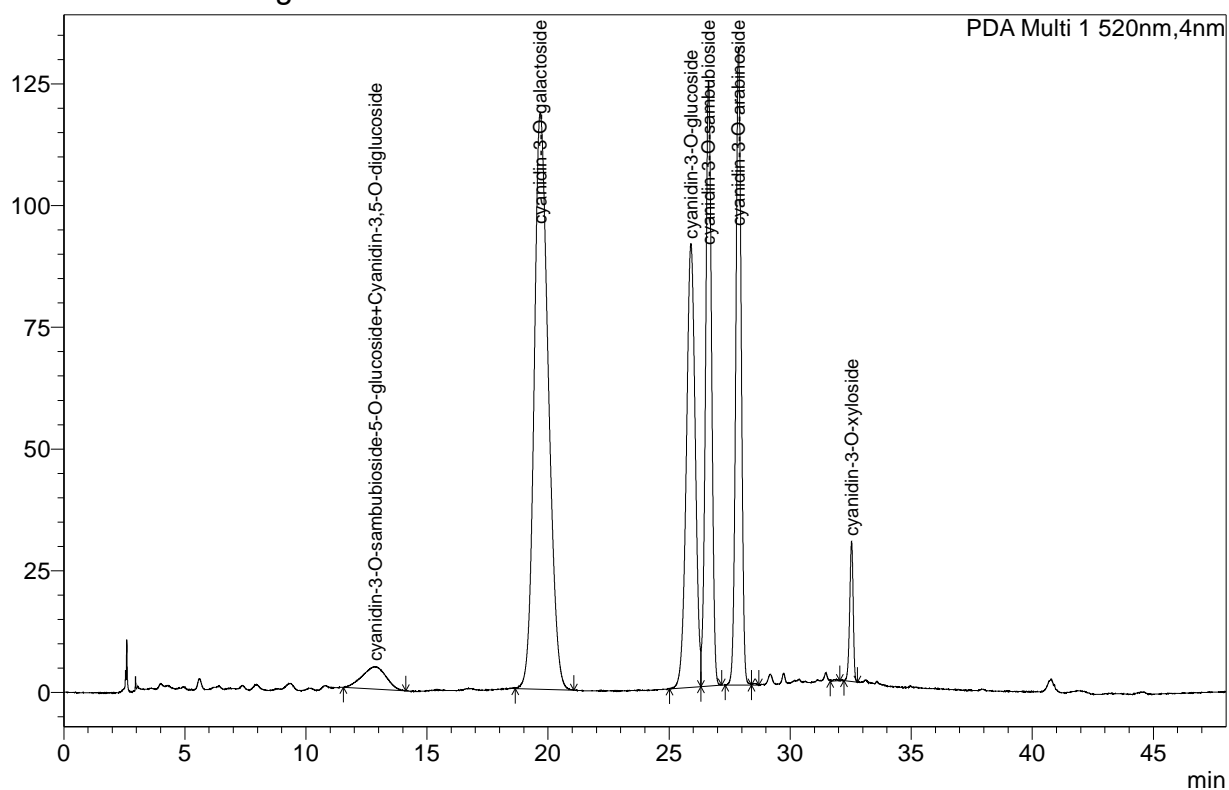

Supplement: s1 [file s1]
